# Supplementary material for: Scalable synthesis of catalysts for the Mizoroki–Heck cross coupling reaction: palladium nanoparticles assembled in a polymeric nanosphere
Source: Royal Society of Chemistry journal article supplement (doi:10.1039/c0nj00898b), 2011-01-01
Supplement: c0nj00898b.pdf [file c0nj00898b.pdf]

## Supporting Information

Scalable Synthesis of Catalysts for the Mizoroki-Heck Cross Coupling Reaction:

Palladium Nanoparticles Assembled in a Polymeric Nanosphere

*Jianli Zou,<sup>a</sup> K. Swaminathan Iyer<sup>\*a</sup>, Scott G. Stewart<sup>\*b</sup> and Colin L. Raston<sup>a</sup>*

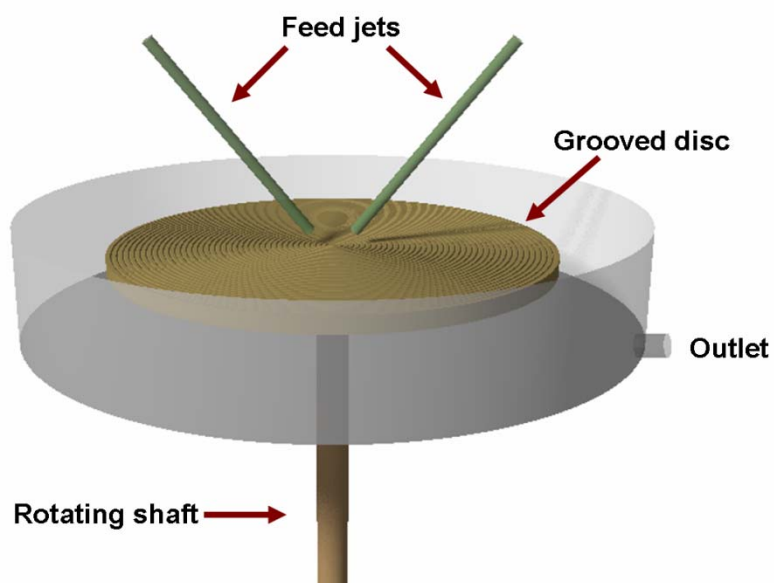

**Figure S1.** Schematic of Spinning Disc Processor (SDP)

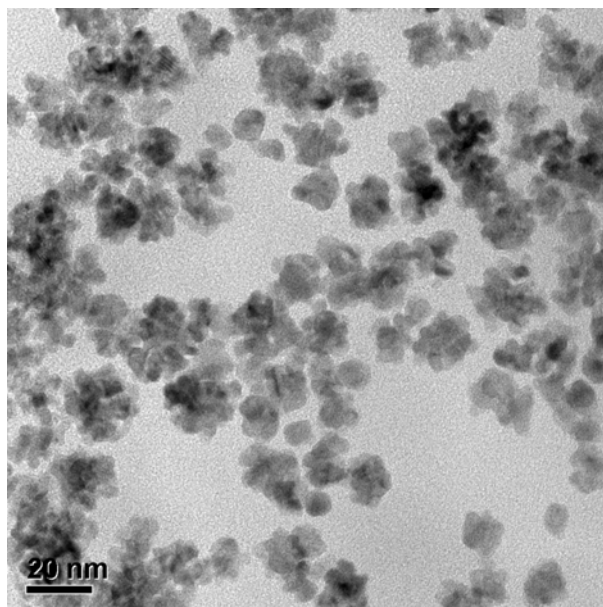

**Figure S2.** TEM image of as-prepared palladium nanoparticles using hydrazine as reducing reagent (other parameters are same as nano-spheres showing in Figure 1(a)).

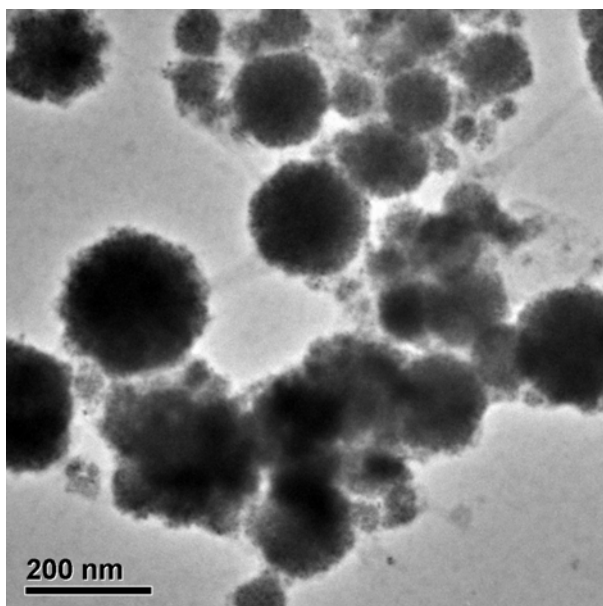

**Figure S3.** TEM image of a typical palladium nanomaterials synthesized using PVP with a molecular weight of 360,000 with a disc speed of 2500 rpm.

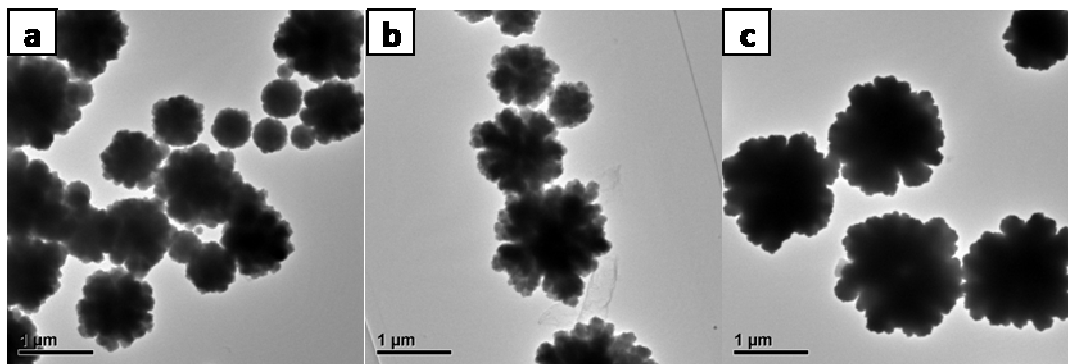

**Figure S4.** TEM images of palladium-PVP spheres synthesized via mechanical stirring by using (a) PVP10 (MW 10,000); (b) PVP40 (MW 40,000) and (c) PVP360 (MW 360,000).

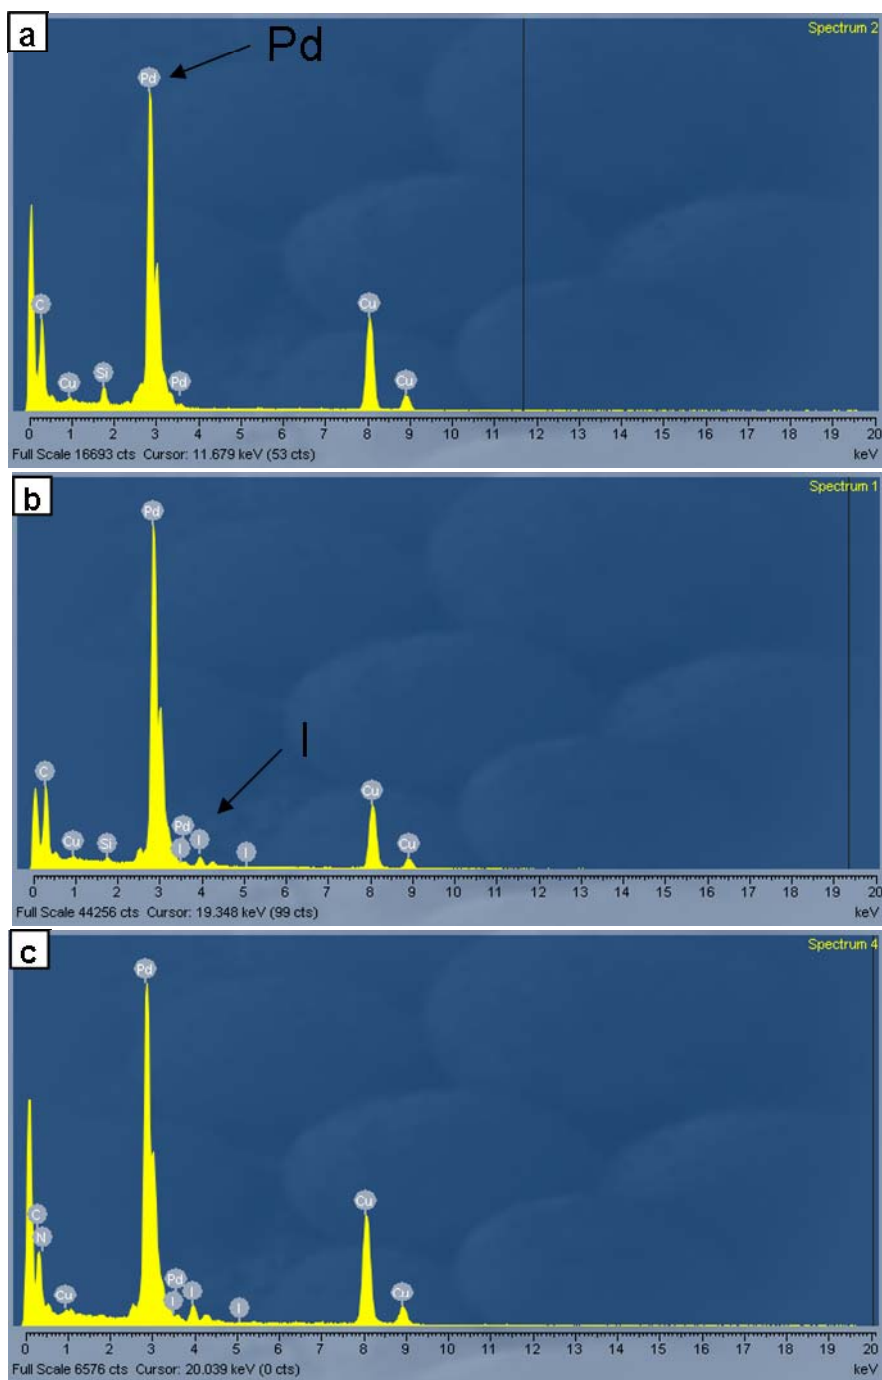

**Figure S5.** EDS data of palladium nanospheres. (a) pristine; (b) after 1<sup>st</sup> run; (c) after 5<sup>th</sup> run.

### <sup>1</sup>H NMR data and GC-MS data

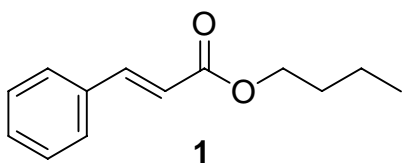

<sup>1</sup>H NMR (400 MHz, CDCl<sub>3</sub>, ppm): δ 7.68 (d, 1H, *J*=16.0 Hz), 7.54–7.52 (m, 2H), 7.39–7.37 (m, 3H), 6.44 (d, 1H, *J*=16.0 Hz), 4.21 (t, 2H, *J*=6.6 Hz), 1.69 (quint, 2H, *J*=7.2 Hz), 1.44 (sextet, 2H, *J*=7.4 Hz), 0.97 (t, 3H, *J*=7.6 Hz); GC-MS *m/z* (relative intensity): 204 (M<sup>+</sup>, 18), 148 (74), 131 (100), 103 (57), 77 (38).

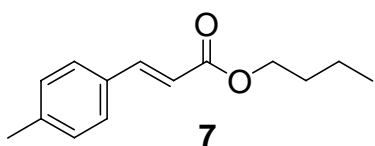

<sup>1</sup>H NMR (400 MHz, CDCl<sub>3</sub>, ppm): δ 7.63 (d, 1H, *J*=16.0 Hz), 7.41 (d, 2H, *J*=7.8 Hz), 7.19 (d, 2H, *J*=7.8 Hz), 6.40 (d, 1H, *J*=16.0 Hz), 4.20 (t, 2H, *J*=6.4 Hz), 2.38 (s, 3H), 1.64 (quint, 2H, *J*=7.2 Hz), 1.42 (sextet, 2H, *J*=7.4 Hz), 0.98 (t, 3H, *J*=7.6 Hz); GC-MS *m/z* (relative intensity): 218 (M<sup>+</sup>, 29), 162 (95), 145 (100), 115 (53), 91 (26).

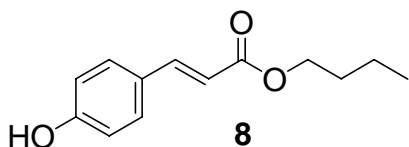

<sup>1</sup>H NMR (400 MHz, CDCl<sub>3</sub>, ppm): δ 7.63 (d, 1H, *J*=16.0 Hz), 7.41 (d, 2H, *J*=8.4 Hz), 6.87 (d, 2H, *J*=8.4 Hz), 6.30 (d, 1H, *J*=16.0 Hz), 5.15 (s, 1H), 4.22 (t, 2H, *J*=6.4 Hz), 1.68 (quint, 2H, *J*=5.6 Hz), 1.43 (sextet, 2H, *J*=7.6 Hz), 0.97 (t, 3H, *J*=7.2 Hz); GC-MS *m/z* (relative intensity): 220 (M<sup>+</sup>, 21), 164 (100), 147 (50), 119 (24), 107 (22).

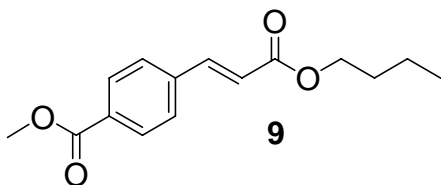

<sup>1</sup>H NMR (400 MHz, CDCl<sub>3</sub>, ppm): δ 8.03 (d, 2H, *J*=4.0 Hz), 7.67 (d, 1H, *J*=8.0 Hz), 7.56 (d, 2H, *J*=4.0 Hz), 6.50 (d, 1H, *J*=8.0 Hz), 4.21 (d, 2H, *J*=6.4 Hz), 3.91 (s, 3H), 1.68

(quint, 2H,  $J=7.2\text{Hz}$ ), 1.42 (sextet, 2H,  $J=7.6\text{Hz}$ ), 0.95 (t, 3H,  $J=7.2\text{ Hz}$ ); GC-MS  $m/z$  (relative intensity): 262 ( $M^+$ , 28), 206 (100), 189 (46), 175 (75), 145 (43).

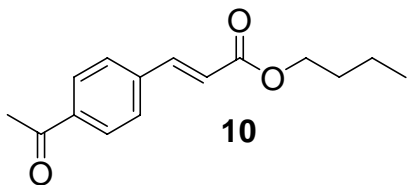

$^1\text{H NMR}$  (400MHz,  $\text{CDCl}_3$ , ppm):  $\delta$  7.97 (d, 2H,  $J=4.4\text{Hz}$ ), 7.69 (d, 1H,  $J=8.0\text{Hz}$ ), 7.61 (d, 2H,  $J=4.4\text{Hz}$ ), 6.53 (d, 1H,  $J=8.0\text{Hz}$ ), 4.23 (t, 2H,  $J=6.8\text{Hz}$ ), 2.62 (s, 3H), 1.70 (quint, 2H,  $J=7.2\text{Hz}$ ), 1.44 (sextet, 2H,  $J=7.6\text{Hz}$ ), 0.97 (t, 3H,  $J=7.6\text{Hz}$ ); GC-MS  $m/z$  (relative intensity): 246 ( $M^+$ , 18), 231(46), 190 (39), 175 (100), 131 (32).

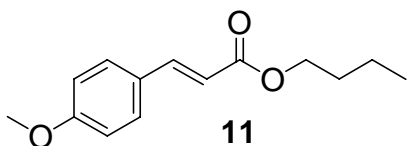

$^1\text{H NMR}$  (400 MHz,  $\text{CDCl}_3$ , ppm):  $\delta$  7.67 (d, 1H,  $J=8.0\text{ Hz}$ ), 7.48 (d, 2H,  $J=4.4\text{Hz}$ ), 6.90 (d, 2H,  $J=4.4\text{ Hz}$ ), 6.31 (d, 1H,  $J=8.0\text{Hz}$ ), 4.20 (t, 2H,  $J=6.4\text{ Hz}$ ), 3.84 (s, 3H), 1.69 (quint, 2H,  $J=7.2\text{Hz}$ ), 1.47(sextet, 2H,  $J=7.2\text{Hz}$ ), 0.96 (t, 3H,  $J=7.2\text{ Hz}$ ); GC-MS  $m/z$  (relative intensity): 234 ( $M^+$ , 42), 178 (100), 161 (98), 134 (41), 121(31).

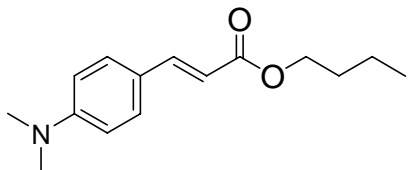

$^1\text{H NMR}$  (400 MHz,  $\text{CDCl}_3$ , ppm):  $\delta$  7.61 (d, 1H,  $J=16.0\text{ Hz}$ ), 7.41 (d, 2H,  $J=6.8\text{ Hz}$ ), 6.63 (d, 2H,  $J=6.8\text{ Hz}$ ), 6.22 (d, 1H,  $J=16.0\text{ Hz}$ ), 4.18 (t, 2H,  $J=6.8\text{ Hz}$ ), 3.00 (s, 6H), 1.70-1.64 (m, 2H), 1.46-1.41 (m, 2H), 0.96 (t, 3H,  $J=7.2\text{ Hz}$ ); GC-MS  $m/z$  (relative intensity): 247 ( $M^+$ , 94), 191 (41), 174 (62), 147 (100).
